# Supplementary material for: Assembly and organization of poly(3-hexylthiophene) brushes and their potential use as novel anode buffer layers for organic photovoltaics
Source: Royal Society of Chemistry journal article supplement (doi:10.1039/c3nr02226a), 2013-01-01
Supplement: c3nr02226a.pdf [file c3nr02226a.pdf]

## Electronic Supplementary Information

### Assembly and Organization of Poly(3-hexylthiophene) Brushes and Their Potential Use as Novel Anode Buffer Layers for Organic Photovoltaics

José Alonzo,<sup>a</sup> W. Michael Kochemba,<sup>b</sup> Deanna L. Pickel,<sup>c</sup> Muruganathan Ramanathan,<sup>c</sup> Zhenzhong Sun,<sup>d</sup> Dawen Li,<sup>d</sup> Jihua Chen,<sup>c</sup> Bobby G. Sumpter,<sup>c,e</sup> William T. Heller,<sup>a</sup> and S. Michael Kilbey II<sup>b,\*</sup>

<sup>a</sup>Biology and Soft Matter Division, Oak Ridge National Laboratory, Oak Ridge, TN 37831;

<sup>b</sup>Departments of Chemistry and of Chemical and Biomolecular Engineering, University of Tennessee, Knoxville, TN 37996;

<sup>c</sup>Center for Nanophase Materials Sciences, Oak Ridge National Laboratory, Oak Ridge, TN 37831;

<sup>d</sup>Department of Electrical and Computer Engineering and Center for Materials for Information Technology, University of Alabama, Tuscaloosa, AL 35487;

<sup>e</sup>Computer Science and Mathematics Division, Oak Ridge National Laboratory, Oak Ridge, TN 37831.

*Thermal Characterizations.* The temperature range used for studies of P3HT brush formation was identified through standard thermal gravimetric analysis performed using a TA Instruments Q5000IR TGA and a protocol in which the samples were heated from ambient temperature to 500.0 °C at 10.0 °C/min. Both P3HT-3K and P3HT-4K show an onset of degradation around 450 °C, as seen in **Figure S1**.

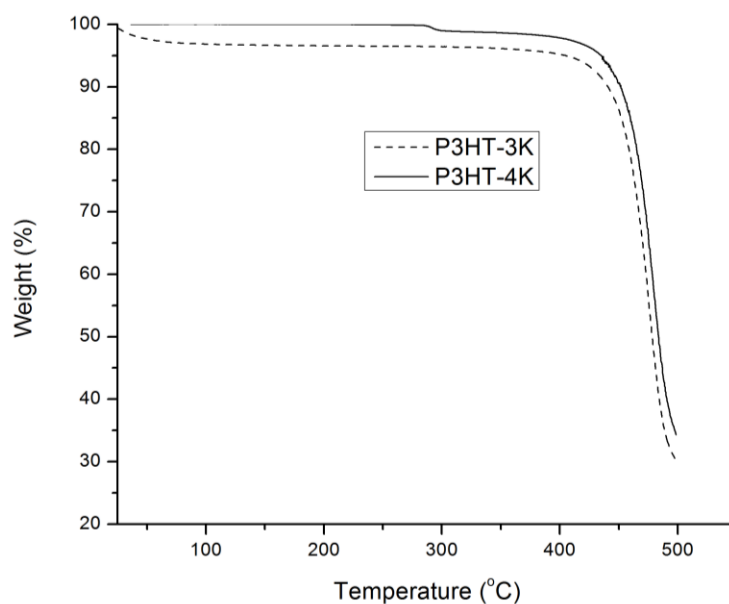

**Figure S1.** TGA thermograms of P3HTs used in this study.

A TA Instruments Q1000 differential scanning calorimeter (DSC) was used to evaluate thermal transitions of the P3HTs from the second heating ramp of a heat/cool/heat protocol. The DSC was baseline calibrated using sapphire standards (TA Instruments) and the temperature calibration was performed with an indium standard (melting point of 156.6 °C, provided by TA Instruments). Samples were first equilibrated at -50.0 °C, then heated to 250.0 °C using a ramp rate of 5.0 °C/min, cooled to -50.0 °C at 5.0 °C/min, and finally heated to 250.0 °C at the same ramp rate. Melting temperatures of 216 °C and 208 °C for P3HT-3K and P3HT-4K, respectively, are assigned from the peak in the heat flow curve acquired during a second heating cycle (identified by red crosses). **Figure S2** shows those DSC heat flow curves along with an inset plot showing the derivative of heat flow as a function of temperature. This representation of the data also indicates that melting temperatures are ~210 °C for these low molecular weight P3HTs. These melting temperatures are in good agreement with values reported by Zhao et al.<sup>[S1]</sup>

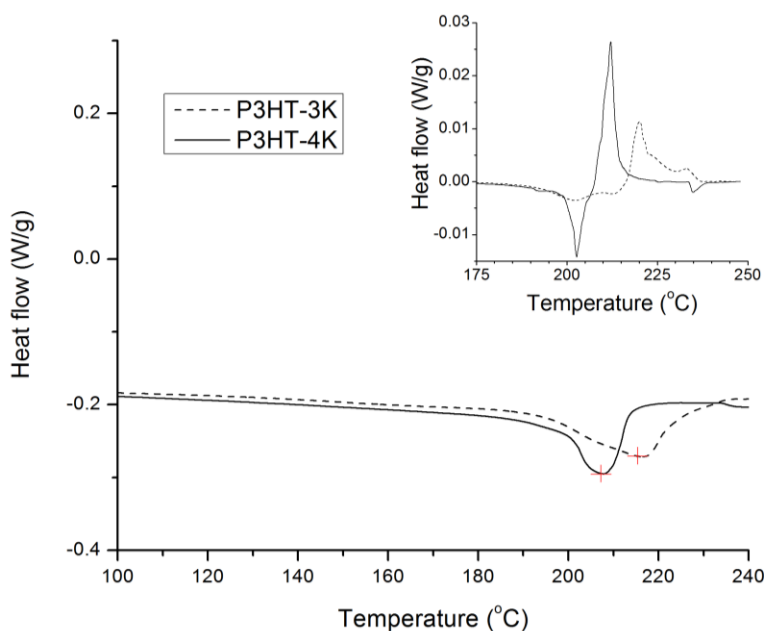

**Figure S2.** DSC heat flow traces of the second heating cycle and (inset) the derivative of heat flow.

## Reference

- [S1] Zhao, J.; Swinnen, A.; Van Assche, G.; Manca, J.; Vanderzande, D.; Van Mele, B. J. *Phys. Chem. B* 2009, 113, 1587-1591.
